# Supplementary material
Source: MDPI journal article supplement (https://www.mdpi.com/2073-4344/12/2/221)
Supplement: s1 [file s1]

# Facile Synthesis of Sillén-Aurivillius Layered Oxide $\text{Bi}_7\text{Fe}_2\text{Ti}_2\text{O}_{17}\text{Cl}$ with Efficient Photocatalytic Performance for Degradation of Tetracycline

Yan Gu, Fang Yu, Jikun Chen and Qinfang Zhang \*

School of Materials Science and Engineering, Yancheng Institute of Technology,  
Yancheng 224001, China; ygu9705@gmail.com (Y.G.); yufangjenny@sina.com  
(F.Y.); ww912251@gmail.com (J.C.)

\* Correspondence: qfangzhang@gmail.com

Figures S1–S6

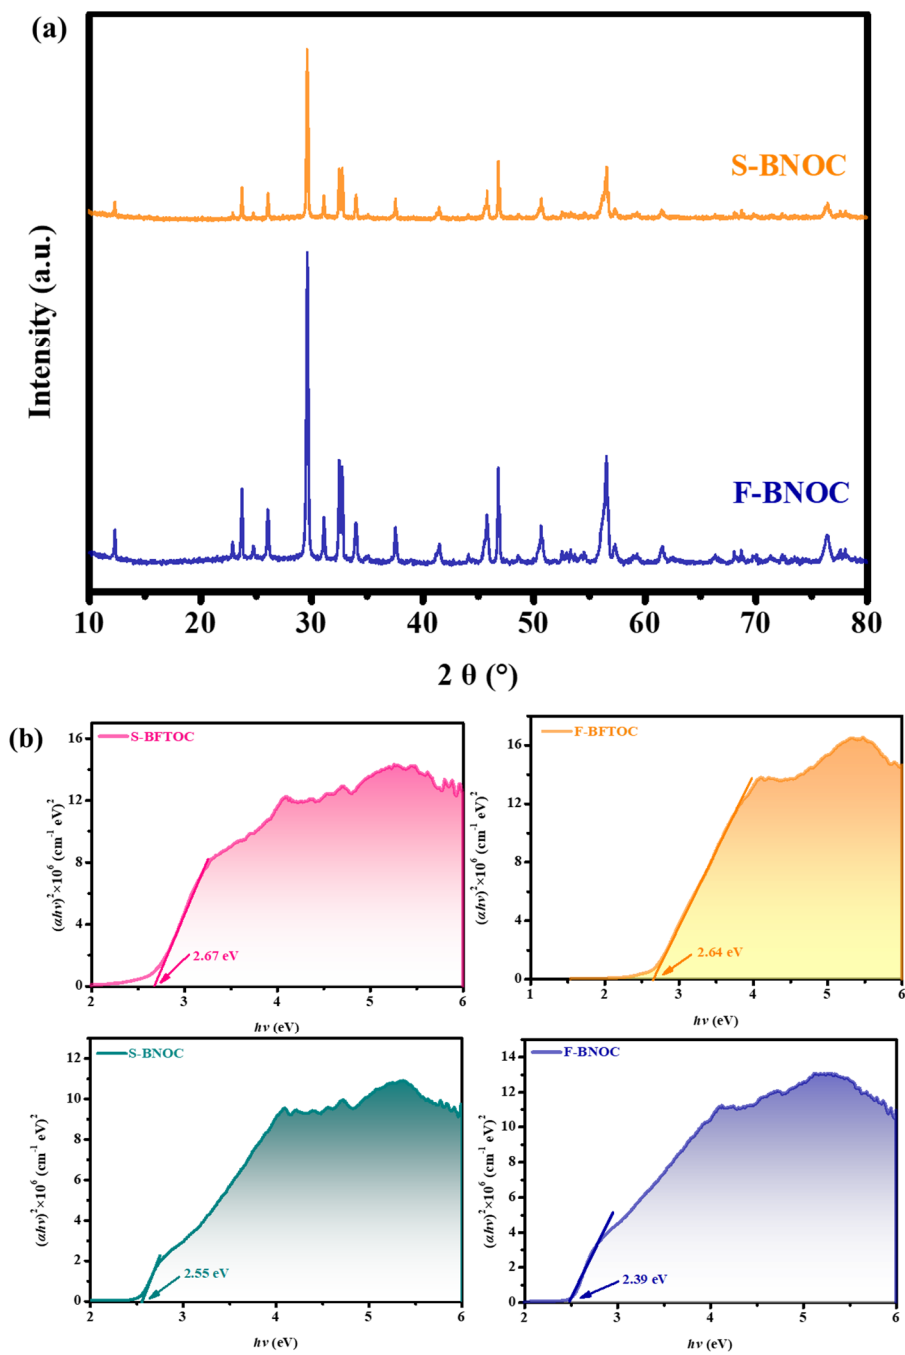

Figure. S1. XRD patterns of F-BNOC and S-BNOC (a), Tauc's band-gap plots of S-BFTOC, F-BFTOC, S-BNOC and F-BNOC (b).

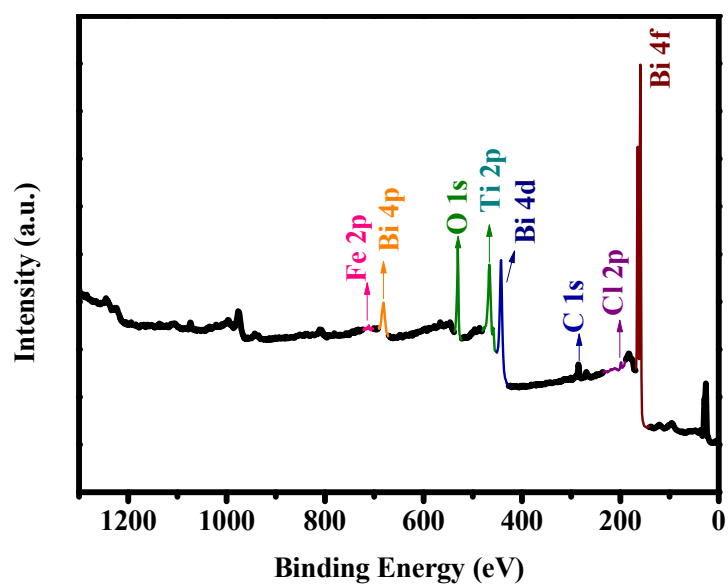

Figure S2. XPS survey spectra of F-BFTOC corresponding to Bi, Fe, Ti, O and Cl

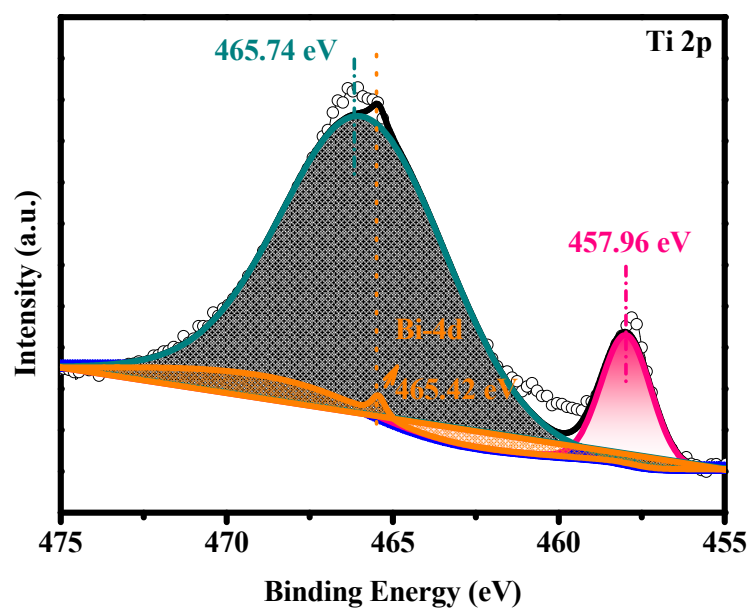

Figure S3. Ti 2p XPS spectrum of the  $\text{Bi}_7\text{Fe}_2\text{Ti}_2\text{O}_{17}\text{Cl}$  sample

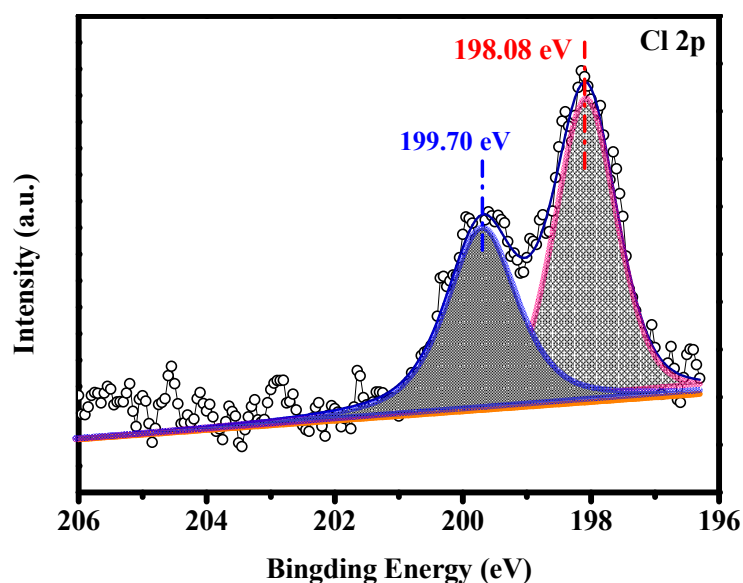

Figure S4. Cl 2p XPS spectrum of the  $\text{Bi}_7\text{Fe}_2\text{Ti}_2\text{O}_{17}\text{Cl}$  sample

**Table S1. Linear Fit kinetics data of BFTOC and BNOC photocatalytic reaction**

| photocatalyst | equation               | Adj. $R^2$ |
|---------------|------------------------|------------|
| S-BFTOC       | $y = 0.4965x + 2.8642$ | 0.9939     |
| F-BFTOC       | $y = 0.5865x + 0.9243$ | 0.9817     |
| S-BNOC        | $y = 0.0104x + 0.1478$ | 0.9632     |
| F-BNOC        | $y = 0.0145x + 0.2956$ | 0.9227     |

\*pseudo-first-order kinetics model (S-BNOC and F-BNOC)and pseudo-second-order kinetics model(S-BFTOC and F-BFTOC)

**Table S2. Linear Fit kinetics data of BFTOC and BNOC photocatalytic reaction.**

| photocatalyst | equation               | Adj. $R^2$ |
|---------------|------------------------|------------|
| S-BFTOC       | $y = 0.0241x + 0.079$  | 0.9924     |
| F-BFTOC       | $y = 0.0351x + 0.0536$ | 0.9872     |
| S-BNOC        | $y = 0.0058x + 0.0093$ | 0.9955     |
| F-BNOC        | $y = 0.0142x + 0.0615$ | 0.9916     |

\*pseudo-first-order kinetics model



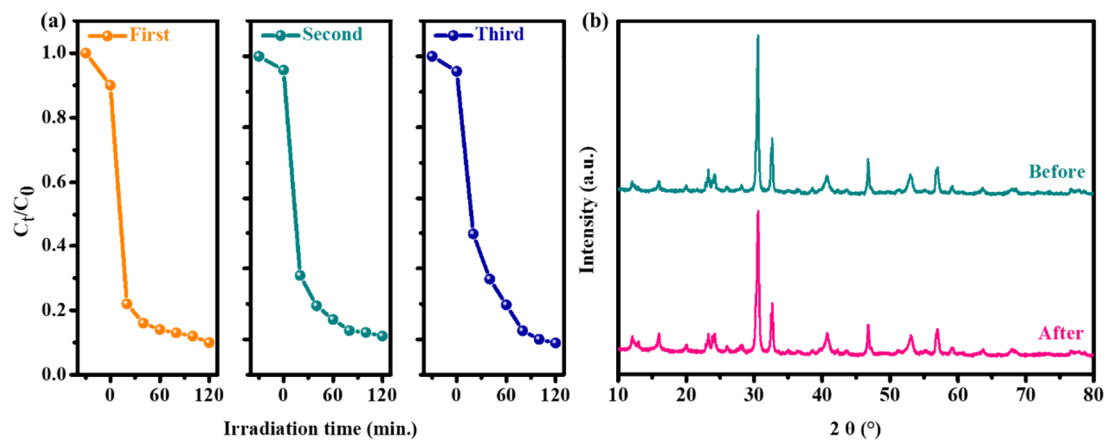

Figure S5. photocatalytic stability of TC degradation over F-BFTOC under visible light irradiation (a); XRD patterns of F-BFTOC photocatalyst before and after the degradation of TC (b)

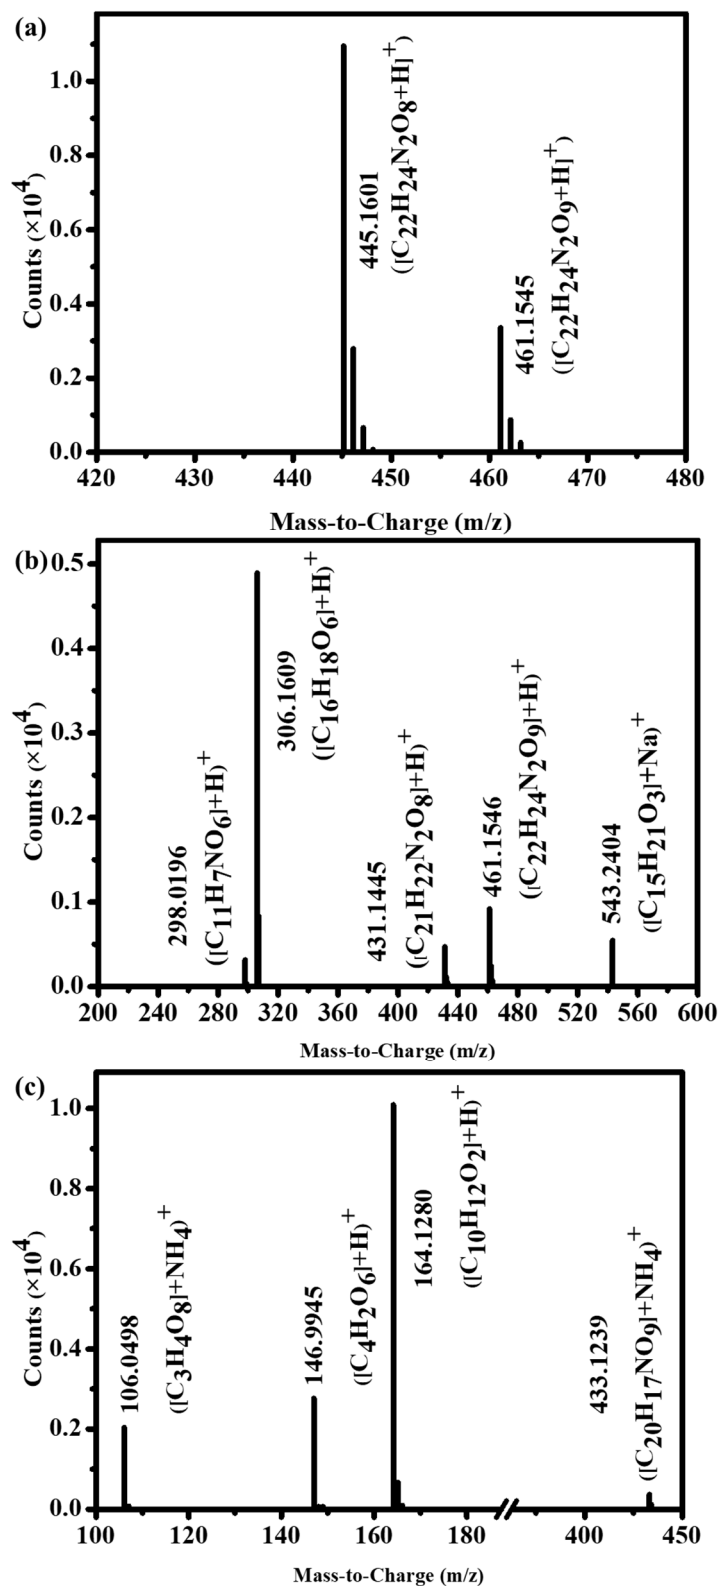

Figure S6. HPLC-MS chromatograms for monitoring the degradation of TC with F-BFTOC (a) 0 min (b) 40 min (c) 120 min.
